- Peters J, Adamzik M: AQP5-1364A/C polymorphism and the AQP5 expression influence sepsis survival and immune cell migration: A prospective laboratory and patient study. *J Transl Med* 2016; 14:321
9. Calfee CS, Janz DR, Bernard GR, May AK, Kangelaris KN, Matthay MA, Ware LB: Distinct molecular phenotypes of direct vs indirect ARDS in single-center and multicenter studies. *Chest* 2015; 147:1539–48
  10. Calfee CS, Delucchi K, Parsons PE, Thompson BT, Ware LB, Matthay MA; NHLBI ARDS Network: Subphenotypes in acute respiratory distress syndrome: Latent class analysis of data from two randomised controlled trials. *Lancet Respir Med* 2014; 2:611–20
  11. Calfee CS, Delucchi KL, Sinha P, Matthay MA, Hackett J, Shankar-Hari M, McDowell C, Laffey JG, O’Kane CM, McAuley DF; Irish Critical Care Trials Group: Acute respiratory distress syndrome subphenotypes and differential response to simvastatin: Secondary analysis of a randomised controlled trial. *Lancet Respir Med* 2018; 6:691–8

## ANESTHESIOLOGY REFLECTIONS FROM THE WOOD LIBRARY-MUSEUM

### Etherist Crawford Long on a Cinderella Stamp

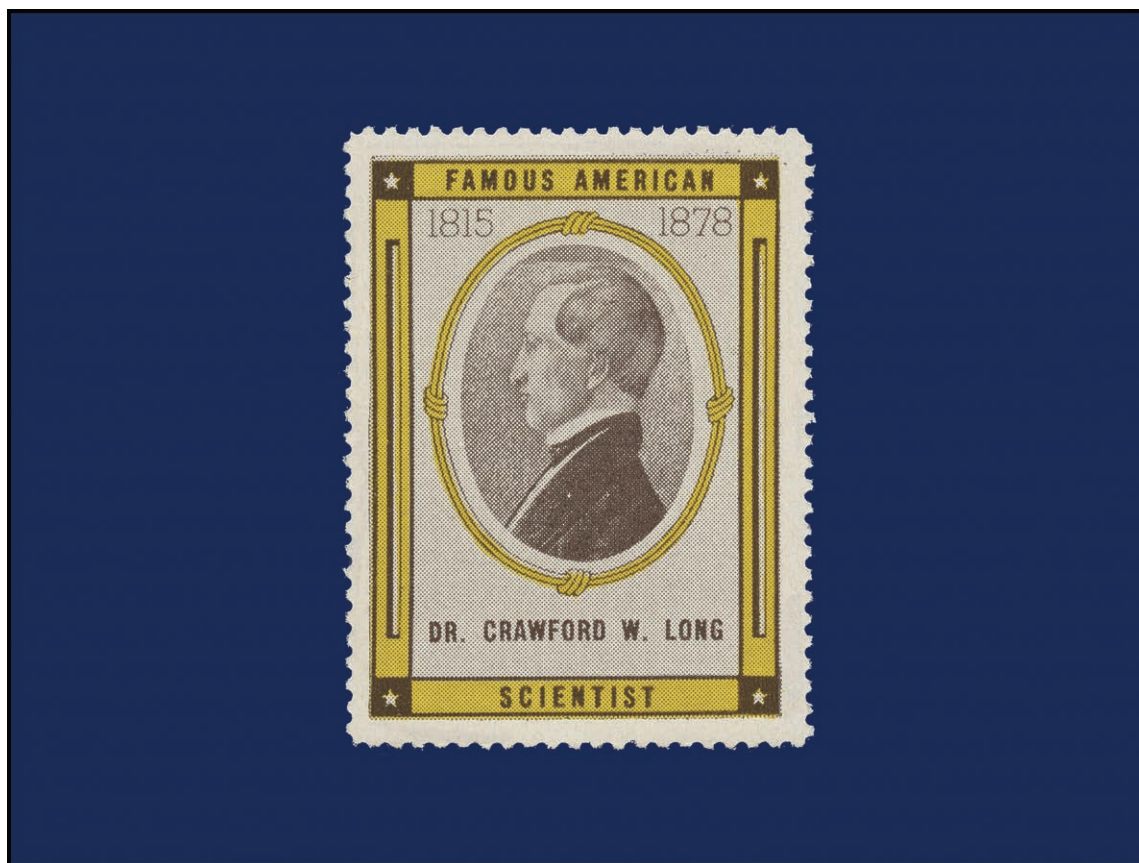

By founding the Cinderella Stamp Club (1959), editing their journal *The Cinderella Philatelist*, and authoring their classic 152-page book *Cinderella Stamps* (1970), British brothers Leon and Maurice Williams popularized the collecting of stamp-like but nonpostal “emissions.” Philatelist James Mackay defined Cinderellas as “virtually anything resembling a postage stamp, but not issued for postal purposes by a government postal administration.” For anesthesiologists, one of the more interesting Cinderella stamps is this one (*above*) depicting the left profile of pioneering etherist Crawford W. Long, M.D. (1815 to 1878) of Jefferson, Georgia. This yellow-and-gray Cinderella was likely issued around 1940, the year that the U.S. Postal Service released its red-colored 2-cent postage stamp honoring Dr. Long. (Copyright © the American Society of Anesthesiologists’ Wood Library-Museum of Anesthesiology.)

George S. Bause, M.D., M.P.H., *Honorary Curator and Laureate of the History of Anesthesia, Wood Library-Museum of Anesthesiology, Schaumburg, Illinois, and Clinical Associate Professor, Case Western Reserve University, Cleveland, Ohio. UJYC@aol.com.*
